# Supplementary material
Source: MDPI journal article supplement (https://www.mdpi.com/2311-7524/9/5/524)
Supplement: s1 [file s1]

Table S2. List of taxa, GenBank accession numbers, and references for the previously published ITS1-5.8S-ITS2 sequences used in this study.

| Species                                     | GenBank accession number | References                        |
|---------------------------------------------|--------------------------|-----------------------------------|
| <i>V. austriaca</i> subsp. <i>jacquinii</i> | KT361675                 | Rojas-Andres et al. 2015          |
| <i>V. persica</i>                           | DQ534897                 | Kaplan and Hasanoglu, unpublished |
| <i>V. persica</i>                           | AF313001                 | Albach and Chase 2001             |
| <i>V. polita</i>                            | AF509818                 | Albach et al. 2004.               |
| <i>V. chamaedrys</i>                        | AF313003                 | Albach and Chase 2001             |
| <i>V. arvensis</i>                          | AF313002                 | Albach and Chase 2001             |
| <i>V. hederæfolia</i>                       | AJ548981                 | Ronald et al 2003                 |
| <i>V. cymbalaria</i>                        | AY741526                 | Munoz-Centeno et al. 2006         |
| <i>V. longifolia</i>                        | AY673619                 | Albach et al. 2005                |
| <i>V. saturejoides</i>                      | EU282097                 | Albach et al. 2009                |
| <i>V. montana</i>                           | AF313014                 | Albach and Chase 2001             |
| <i>V. officinalis</i>                       | AF313012                 | Albach and Chase 2001             |
| <i>V. serpyllifolia</i>                     | AF313017                 | Albach and Chase 2001             |
| <i>V. acinifolia</i>                        | AF509798                 | Albach et al. 2004.               |
| <i>V. beccabunga</i>                        | AF313015                 | Albach and Chase 2001             |
| <i>V. anagallis-aquatica</i>                | KJ630576                 | Meudt et al 2014, unpublished     |
| <i>V. anagalloides</i> ssp. <i>heureka</i>  | KJ630578                 | Meudt et al 2014, unpublished     |
| <i>Satureja montana</i>                     | EU823287                 | Bezić et al 2009                  |
| <i>Satureja subspicata</i>                  | EU823288                 | Bezić et al. 2009                 |
| <i>Clinopodium macrostemun</i>              | JQ668083                 | Drew and Sytsma 2012              |
