# Supplementary material
Source: MDPI journal article supplement (https://www.mdpi.com/2311-7524/9/5/524)
Supplement: s1 [file s1]

Table S1: GenBank accession numbers for the ITS2 and ITS1-5.8S-ITS2 sequences of *Veronica* species obtained in this study

| Species                                       | ITS2<br>GenBank number | ITS1-5.8S-ITS2<br>GenBank number |
|-----------------------------------------------|------------------------|----------------------------------|
| <i>V. dalmatica_1</i>                         | OQ594828               |                                  |
| <i>V. dalmatica_2</i>                         | OQ594829               | OQ564378                         |
| <i>V. dalmatica_3</i>                         | OQ594830               | OQ564379                         |
| <i>V. polita_1</i>                            | OQ594831               |                                  |
| <i>V. polita_2</i>                            | OQ594832               |                                  |
| <i>V. polita_3</i>                            | OQ594833               | OQ564385                         |
| <i>V. austriaca</i> subsp. <i>jacquinii_1</i> | OQ594834               |                                  |
| <i>V. austriaca</i> subsp. <i>jacquinii_2</i> | OQ594835               | OQ564380                         |
| <i>V. austriaca</i> subsp. <i>jacquinii_3</i> | OQ594836               |                                  |
| <i>V. chamaedrys_1</i>                        | OQ594837               |                                  |
| <i>V. chamaedrys_2</i>                        | OQ594838               |                                  |
| <i>V. chamaedrys_3</i>                        | OQ594839               |                                  |
| <i>V. saturejoides_1</i>                      | OQ594840               |                                  |
| <i>V. saturejoides_2</i>                      | OQ594841               |                                  |
| <i>V. saturejoides_3</i>                      | OQ594842               |                                  |
| <i>V. officinalis_1</i>                       | OQ594843               |                                  |
| <i>V. officinalis_2</i>                       | OQ594844               |                                  |
| <i>V. officinalis_3</i>                       | OQ594845               |                                  |
| <i>Veronica anagallis-aquatica_1</i>          | OQ594846               |                                  |
| <i>Veronica anagallis-aquatica_2</i>          | OQ594847               |                                  |
| <i>Veronica anagallis-aquatica_3</i>          | OQ594848               |                                  |
| <i>Veronica anagalloides_1</i>                | OQ594849               |                                  |
| <i>Veronica anagalloides_2</i>                | OQ594850               |                                  |
| <i>Veronica anagalloides_3</i>                | OQ594851               |                                  |
| <i>Veronica cymbalaria_1</i>                  | OQ594852               | OQ564383                         |
| <i>Veronica cymbalaria_2</i>                  | OQ594853               |                                  |
| <i>Veronica hederifolia_1</i>                 | OQ594854               |                                  |
| <i>Veronica hederifolia_2</i>                 | OQ594855               |                                  |
| <i>Veronica hederifolia_3</i>                 | OQ594856               |                                  |
| <i>Veronica montana_1</i>                     | OQ594857               |                                  |
| <i>Veronica montana_2</i>                     | OQ594858               |                                  |
| <i>Veronica montana_3</i>                     | OQ594859               |                                  |
| <i>Veronica acinifolia_1</i>                  | OQ594860               |                                  |
| <i>Veronica acinifolia_2</i>                  | OQ594861               | OQ564384                         |
| <i>Veronica acinifolia_3</i>                  | OQ594862               |                                  |
| <i>Veronica persica_1</i>                     | OQ594863               |                                  |
| <i>Veronica persica_2</i>                     | OQ594864               |                                  |
| <i>Veronica persica_3</i>                     | OQ594865               |                                  |
| <i>Veronica arvensis_1</i>                    | OQ594866               |                                  |
| <i>Veronica arvensis_2</i>                    | OQ594867               |                                  |
| <i>Veronica arvensis_3</i>                    | OQ594868               |                                  |
| <i>Veronica serpyllifolia_1</i>               | OQ594869               |                                  |
| <i>Veronica serpyllifolia_2</i>               | OQ594870               |                                  |
| <i>Veronica serpyllifolia_3</i>               | OQ594871               | OQ564386                         |
| <i>Veronica longifolia_1</i>                  | OQ594872               |                                  |
| <i>Veronica longifolia_2</i>                  | OQ594873               |                                  |
| <i>Veronica longifolia_3</i>                  | OQ594874               |                                  |
| <i>Veronica beccabunga_1</i>                  | OQ594875               |                                  |
| <i>Veronica beccabunga_2</i>                  | OQ594876               |                                  |
| <i>Veronica beccabunga_3</i>                  | OQ594877               |                                  |
| <i>Veronica catenata_1</i>                    | OQ594878               |                                  |

|                              |          |          |
|------------------------------|----------|----------|
| <i>Veronica catenata_2</i>   | OQ594879 |          |
| <i>Veronica catenata_3</i>   | OQ594880 | OQ564387 |
| <i>Veronica orbiculata_1</i> |          | OQ564381 |
| <i>Veronica orbiculata_2</i> |          | OQ564382 |

---
